# Supplementary material for: Straightforward synthesis of tetraalkynylpyrazines and their photophysical properties
Source: Royal Society of Chemistry journal article supplement (doi:10.1039/c5ob02083b), 2015-12-14
Supplement: c5ob02083b1.pdf [file c5ob02083b1.pdf]

## Supporting Information

### **Straightforward Synthesis of Tetrachloropyrazines and Their Photophysical Properties**

Andranik Petrosyan, Peter Ehlers, Annette-E. Surkus, Taniel V. Ghochikyan,  
Ashot S. Saghyan, Stefan Lochbrunner, Peter Langer

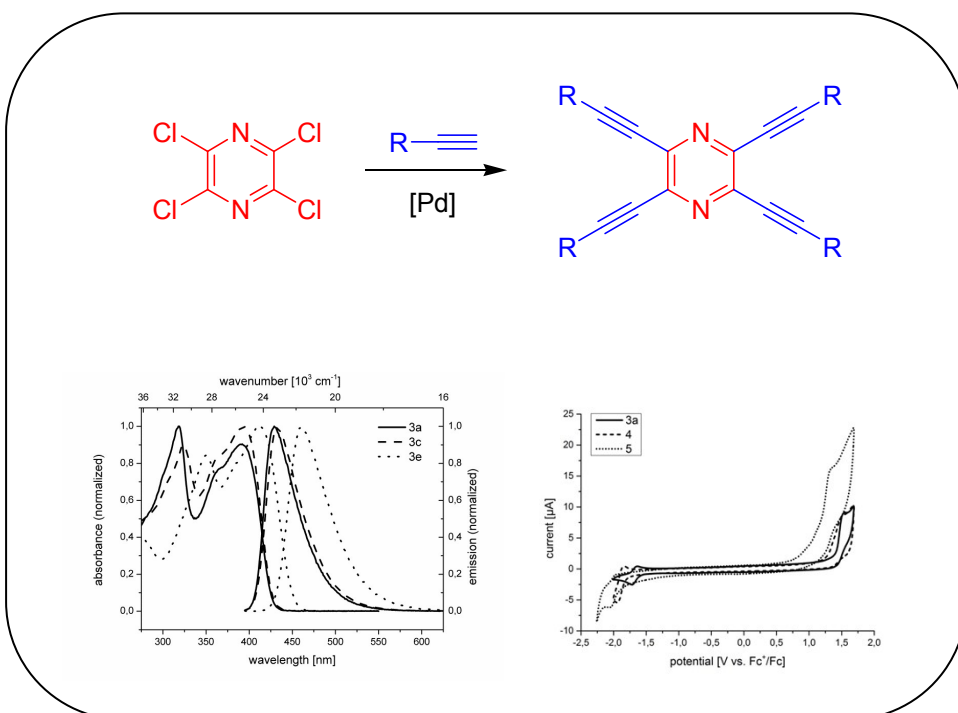

# <sup>1</sup>H- and <sup>13</sup>C-NMR spectra

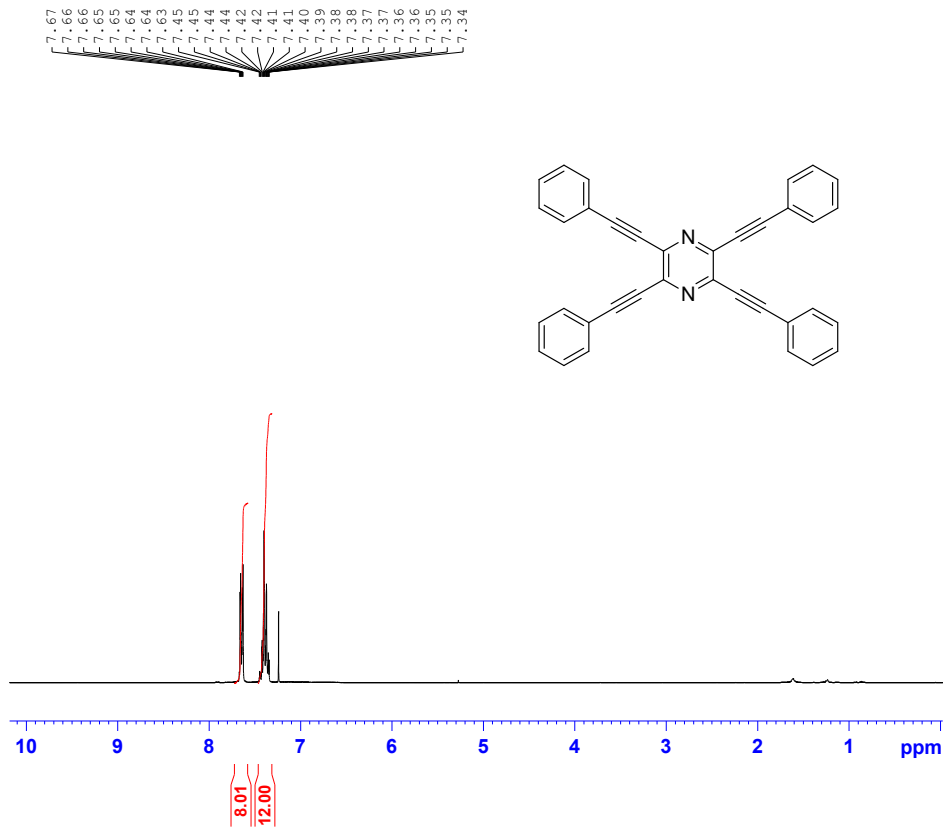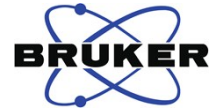

Current Data Parameters  
 NAME AP-120  
 EXPNO 10  
 PROCNO 1

F2 - Acquisition Parameters  
 Date\_ 20120711  
 Time\_ 8.01  
 INSTRUM AV300  
 PROBHD 5 mm PABBO BB-  
 PULPROG zg30  
 TD 32768  
 SOLVENT CDCl3  
 NS 32  
 DS 4  
 SWH 6172.839 Hz  
 FIDRES 0.188380 Hz  
 AQ 2.6542079 sec  
 RG 322.5  
 DW 81.000 usec  
 DE 6.00 usec  
 TE 296.0 K  
 D1 1.0000000 sec  
 TD0 1

===== CHANNEL f1 =====  
 NUC1 1H  
 P1 11.00 usec  
 PL1 0 dB  
 SF01 300.1318534 MHz

F2 - Processing parameters  
 SI 32768  
 SF 300.1300214 MHz  
 WDW EM  
 SSB 0  
 LB 0.10 Hz  
 GB 0  
 PC 1.00

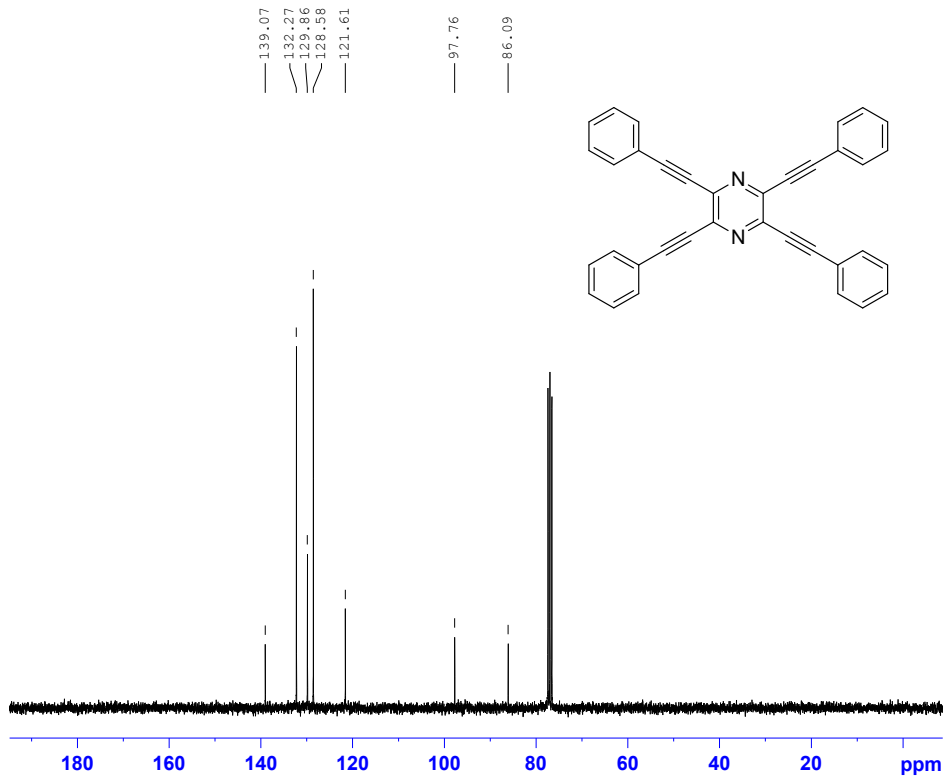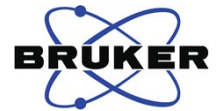

Current Data Parameters  
 NAME AP-120  
 EXPNO 11  
 PROCNO 1

F2 - Acquisition Parameters  
 Date\_ 20120711  
 Time\_ 8.15  
 INSTRUM AV300  
 PROBHD 5 mm PABBO BB-  
 PULPROG zgpg30  
 TD 32768  
 SOLVENT CDCl3  
 NS 256  
 DS 4  
 SWH 21097.047 Hz  
 FIDRES 0.643831 Hz  
 AQ 0.7766016 sec  
 RG 32768  
 DW 23.700 usec  
 DE 6.00 usec  
 TE 296.5 K  
 D1 2.0000000 sec  
 d11 0.0300000 sec  
 DELTA 1.8999999 sec  
 TD0 1  
 SF01 75.4771825 MHz  
 NUC1 13C  
 P1 9.60 usec  
 PLW1 -1.0000000 W  
 SF02 300.1312005 MHz  
 NUC2 1H  
 CPDPRG2 waltz16  
 PCPD2 100.00 usec  
 PLW2 -1.0000000 W  
 PLW12 -1.0000000 W  
 PLW13 -1.0000000 W

F2 - Processing parameters  
 SI 32768  
 SF 75.4677541 MHz  
 WDW EM  
 SSB 0  
 LB 1.00 Hz  
 GB 0  
 PC 1.40

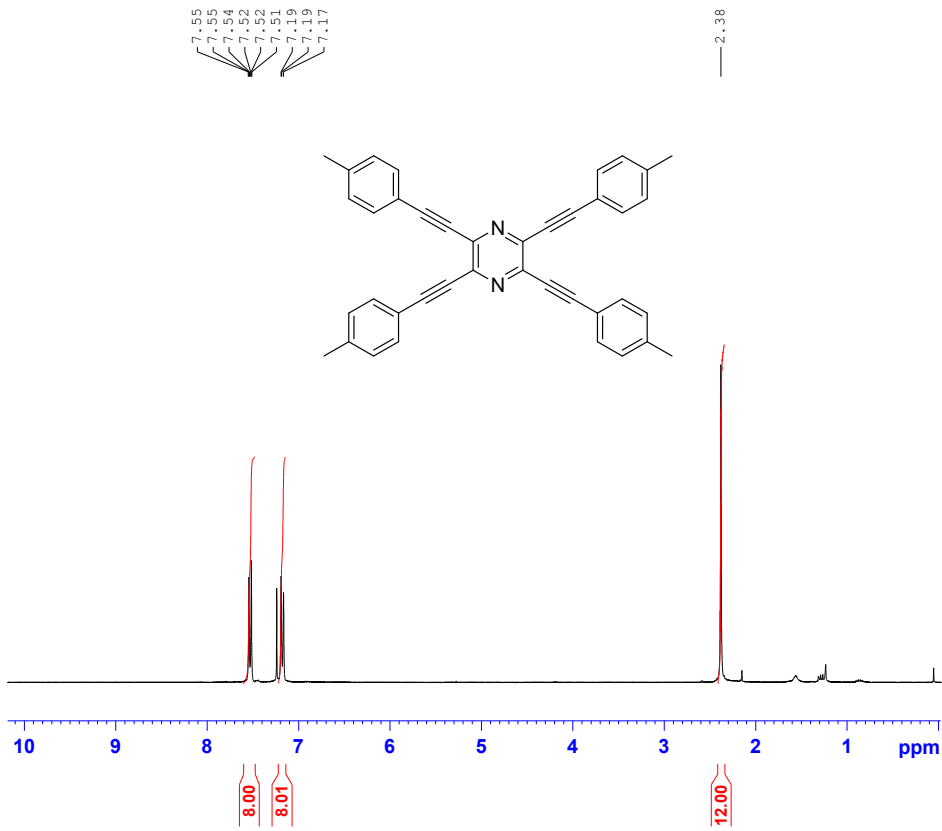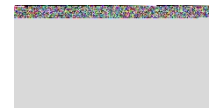

Current Data Parameters  
 NAME AP-179  
 EXPNO 10  
 PROCNO 1

F2 - Acquisition Parameters  
 Date\_ 20120830  
 Time 3.28  
 INSTRUM AV300  
 PROBHD 5 mm PABBO BB-  
 PULPROG zg30  
 TD 32768  
 SOLVENT CDC13  
 NS 32  
 DS 4  
 SWH 6172.839 Hz  
 FIDRES 0.188380 Hz  
 AQ 2.6542079 sec  
 RG 456.1  
 DW 81.000 usec  
 DE 6.00 usec  
 TE 296.0 K  
 D1 1.00000000 sec  
 TD0 1

==== CHANNEL f1 =====  
 NUC1 1H  
 P1 11.00 usec  
 PL1 0 dB  
 SFO1 300.1318534 MHz

F2 - Processing parameters  
 SI 32768  
 SF 300.1300215 MHz  
 WDW EM  
 SSB 0  
 LB 0.10 Hz  
 GB 0  
 PC 1.00

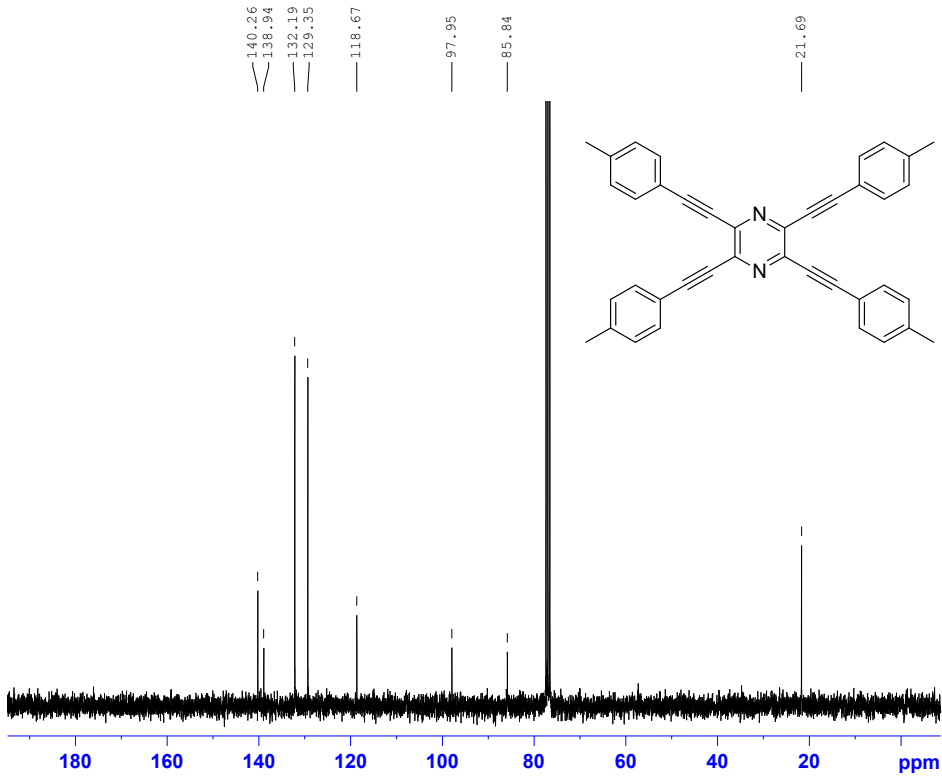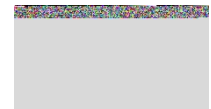

Current Data Parameters  
 NAME AP-179  
 EXPNO 11  
 PROCNO 1

F2 - Acquisition Parameters  
 Date\_ 20120830  
 Time 3.40  
 INSTRUM AV300  
 PROBHD 5 mm PABBO BB-  
 PULPROG zgpg30  
 TD 32768  
 SOLVENT CDC13  
 NS 256  
 DS 4  
 SWH 21097.047 Hz  
 FIDRES 0.643831 Hz  
 AQ 0.7766016 sec  
 RG 32768  
 DW 23.700 usec  
 DE 6.00 usec  
 TE 296.5 K  
 D1 2.00000000 sec  
 d11 0.03000000 sec  
 DELTA 1.89999998 sec  
 TD0 1  
 SFO1 75.4771825 MHz  
 NUC1 13C  
 P1 9.60 usec  
 PLM1 -1.00000000 W  
 SFO2 300.1312005 MHz  
 NUC2 1H  
 CPDPRG[2] waltz16  
 PCPD2 100.00 usec  
 PLW2 -1.00000000 W  
 PLW12 -1.00000000 W  
 PLW13 -1.00000000 W

F2 - Processing parameters  
 SI 32768  
 SF 75.4677531 MHz  
 WDW EM  
 SSB 0  
 LB 1.00 Hz  
 GB 0  
 PC 1.40

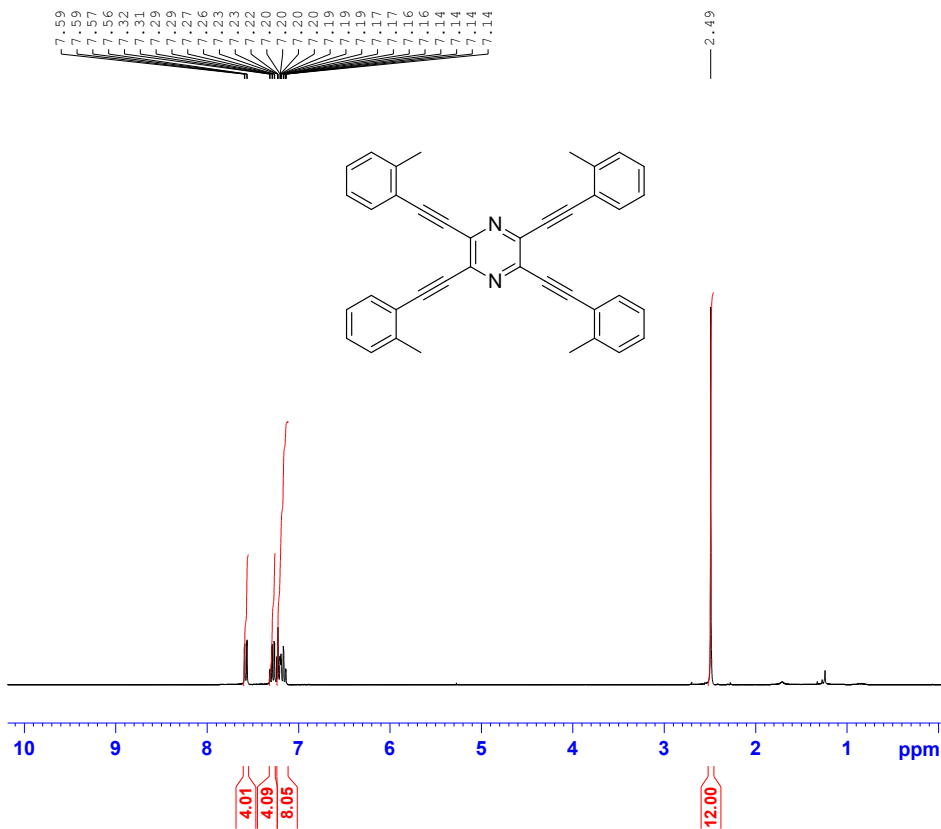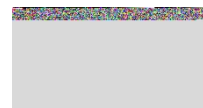

Current Data Parameters  
NAME AP-401  
EXPNO 10  
PROCNO 1

F2 - Acquisition Parameters  
Date\_ 20130620  
Time 5.38  
INSTRUM AV300  
PROBHD 5 mm PABBO BB-  
PULPROG zg30  
TD 32768  
SOLVENT CDCl3  
NS 32  
DS 4  
SWH 6172.839 Hz  
FIDRES 0.188380 Hz  
AQ 2.6542079 sec  
RG 203.2  
DW 81.000 usec  
DE 6.00 usec  
TE 296.1 K  
D1 1.0000000 sec  
TD0 1

===== CHANNEL f1 =====  
NUC1 1H  
P1 11.00 usec  
PL1 0 dB  
SFO1 300.1318534 MHz

F2 - Processing parameters  
SI 32768  
SF 300.1300214 MHz  
WDW EM  
SSB 0  
LB 0.10 Hz  
GB 0  
PC 1.00

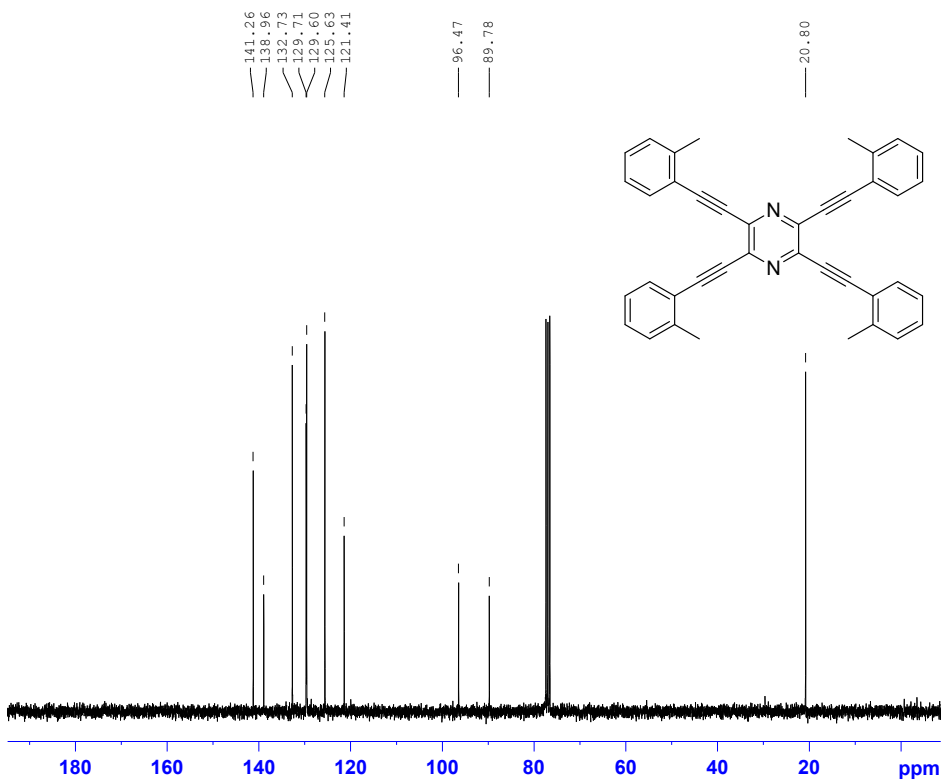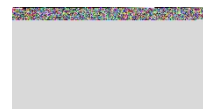

Current Data Parameters  
NAME AP-401  
EXPNO 11  
PROCNO 1

F2 - Acquisition Parameters  
Date\_ 20130620  
Time 5.52  
INSTRUM AV300  
PROBHD 5 mm PABBO BB-  
PULPROG zgpg30  
TD 32768  
SOLVENT CDCl3  
NS 256  
DS 4  
SWH 21097.047 Hz  
FIDRES 0.643831 Hz  
AQ 0.7766016 sec  
RG 32768  
DW 23.700 usec  
DE 6.00 usec  
TE 296.7 K  
D1 2.0000000 sec  
d11 0.0300000 sec  
DELTA 1.89999999 sec  
TD0 1

SFO1 75.4771825 MHz  
NUC1 13C  
P1 9.60 usec  
PLW1 -1.0000000 W  
SFO2 300.1312005 MHz  
NUC2 1H  
CPDPRG2 waltz16  
PCPD2 100.00 usec  
PLW2 -1.0000000 W  
PLW12 -1.0000000 W  
PLW13 -1.0000000 W

F2 - Processing parameters  
SI 32768  
SF 75.4677548 MHz  
WDW EM  
SSB 0  
LB 1.00 Hz  
GB 0  
PC 1.40

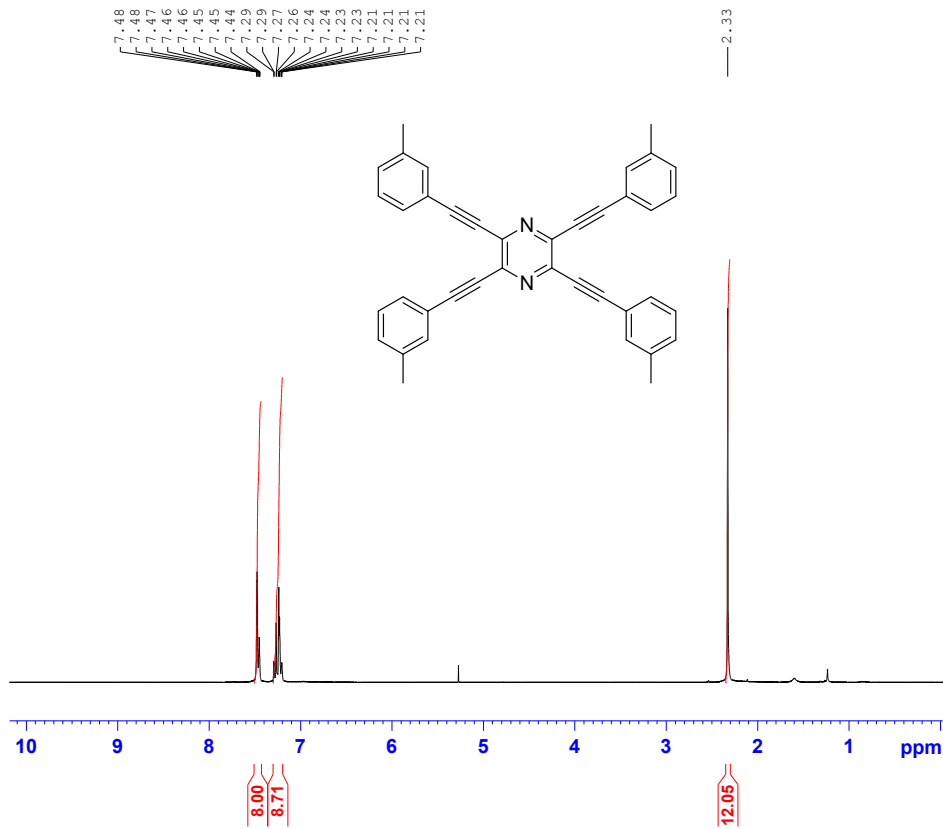

Current Data Parameters  
 NAME AP-402  
 EXPNO 10  
 PROCNO 1

F2 - Acquisition Parameters  
 Date\_ 20130622  
 Time 6.52  
 INSTRUM AV300  
 PROBHD 5 mm PABBO BB-  
 PULPROG zg30  
 TD 32768  
 SOLVENT CDCl3  
 NS 32  
 DS 4  
 SWH 6172.839 Hz  
 FIDRES 0.188380 Hz  
 AQ 2.6542079 sec  
 RG 322.5  
 DW 81.000 usec  
 DE 6.00 usec  
 TE 295.6 K  
 D1 1.00000000 sec  
 TD0 1

==== CHANNEL f1 =====  
 NUC1 1H  
 P1 11.00 usec  
 PL1 0 dB  
 SFO1 300.1318534 MHz

F2 - Processing parameters  
 SI 32768  
 SF 300.1300216 MHz  
 WDW EM  
 SSB 0  
 LB 0.10 Hz  
 GB 0  
 PC 1.00

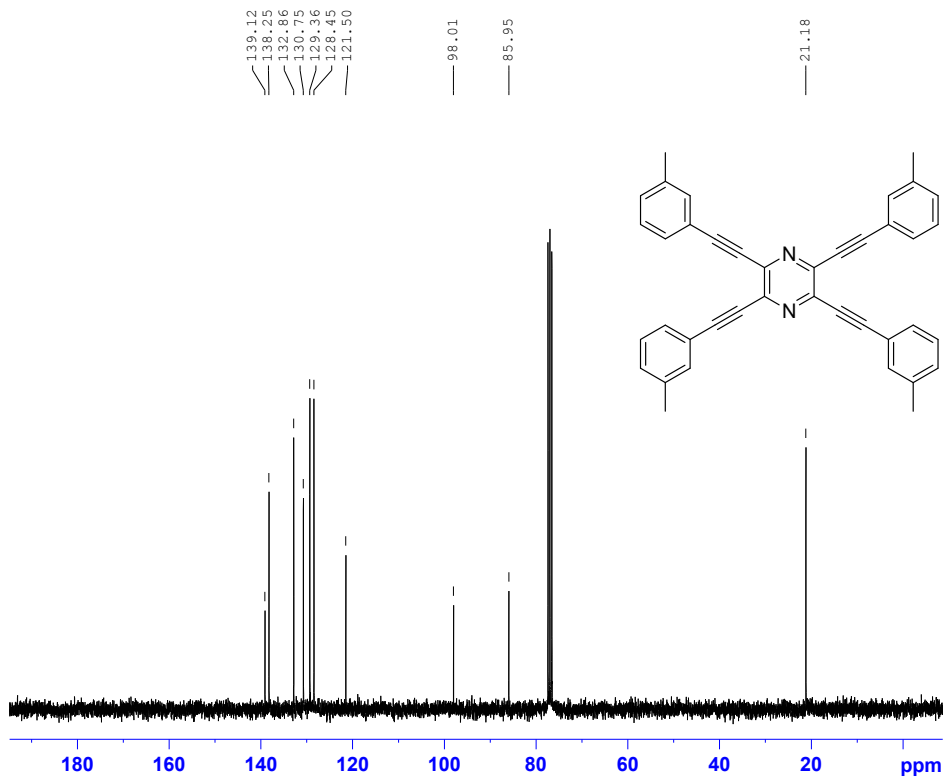

Current Data Parameters  
 NAME AP-402  
 EXPNO 11  
 PROCNO 1

F2 - Acquisition Parameters  
 Date\_ 20130622  
 Time 7.05  
 INSTRUM AV300  
 PROBHD 5 mm PABBO BB-  
 PULPROG zgpg30  
 TD 32768  
 SOLVENT CDCl3  
 NS 256  
 DS 4  
 SWH 21097.047 Hz  
 FIDRES 0.643831 Hz  
 AQ 0.7766016 sec  
 RG 32768  
 DW 23.700 usec  
 DE 6.00 usec  
 TE 296.2 K  
 D1 2.00000000 sec  
 d11 0.03000000 sec  
 DELTA 1.89999998 sec  
 TD0 1  
 SFO1 75.4771825 MHz  
 NUC1 13C  
 P1 9.60 usec  
 PLW1 -1.00000000 W  
 SFO2 300.1312005 MHz  
 NUC2 1H  
 CPDPRG[2] waltz16  
 PCPD2 100.00 usec  
 PLW2 -1.00000000 W  
 PLW12 -1.00000000 W  
 PLW13 -1.00000000 W

F2 - Processing parameters  
 SI 32768  
 SF 75.4677541 MHz  
 WDW EM  
 SSB 0  
 LB 1.00 Hz  
 GB 0  
 PC 1.40

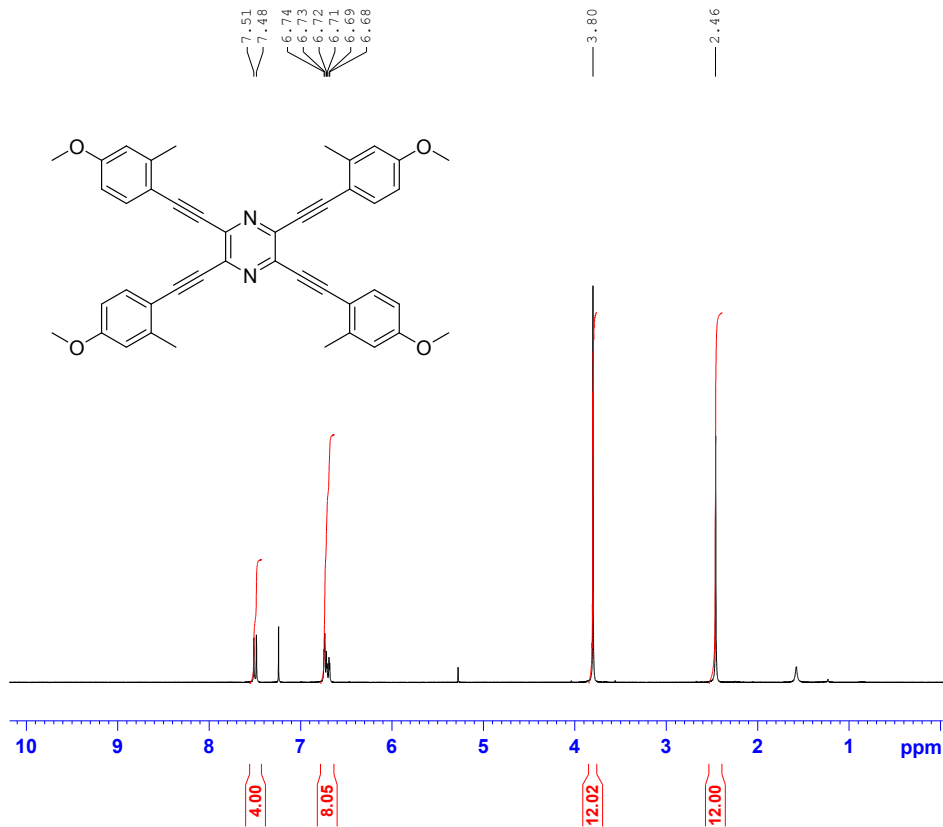

```

Current Data Parameters
NAME          AP-406
EXPNO         10
PROCNO        1

F2 - Acquisition Parameters
Date_         20130625
Time          2.24
INSTRUM       AV300
PROBHD        5 mm PABBO BB-
PULPROG       zg30
TD            32768
SOLVENT       CDCl3
NS            32
DS            4
SWH           6172.839 Hz
FIDRES        0.188380 Hz
AQ            2.6542079 sec
RG            574.7
DE            6.00 usec
TE            295.3 K
D1            1.00000000 sec
TD0           1

===== CHANNEL f1 =====
NUC1          1H
P1            11.00 usec
PL1           0 dB
SFO1          300.1318534 MHz

F2 - Processing parameters
SI            32768
SF            300.1300214 MHz
WDW           EM
SSB           0
LB            0.10 Hz
GB            0
PC            1.00

```

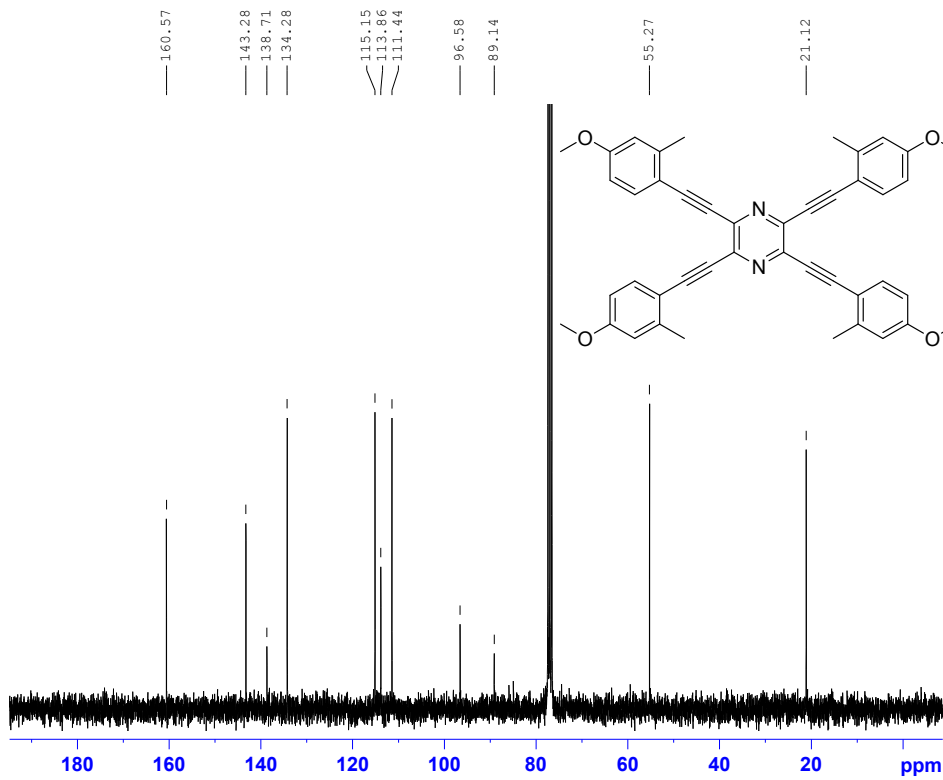

```

Current Data Parameters
NAME          AP-406
EXPNO         11
PROCNO        1

F2 - Acquisition Parameters
Date_         20130625
Time          19.03
INSTRUM       AV300
PROBHD        5 mm PABBO BB-
PULPROG       zgpg30
TD            32768
SOLVENT       CDCl3
NS            1000
DS            4
SWH           21097.047 Hz
FIDRES        0.643831 Hz
AQ            0.7766016 sec
RG            32768
DE            23.700 usec
TE            296.0 K
D1            2.00000000 sec
d11           0.03000000 sec
DELTA         1.89999998 sec
TD0           1
SFO1          75.4771825 MHz
NUC1          13C
P1            9.60 usec
PLW1          -1.00000000 W
SFO2          300.1312005 MHz
NUC2          1H
CPDPRG[2]    waltz16
PCPD2         100.00 usec
PLW2          -1.00000000 W
PLW12         -1.00000000 W
PLW13         -1.00000000 W

F2 - Processing parameters
SI            32768
SF            75.4677528 MHz
WDW           EM
SSB           0
LB            1.00 Hz
GB            0
PC            1.40

```

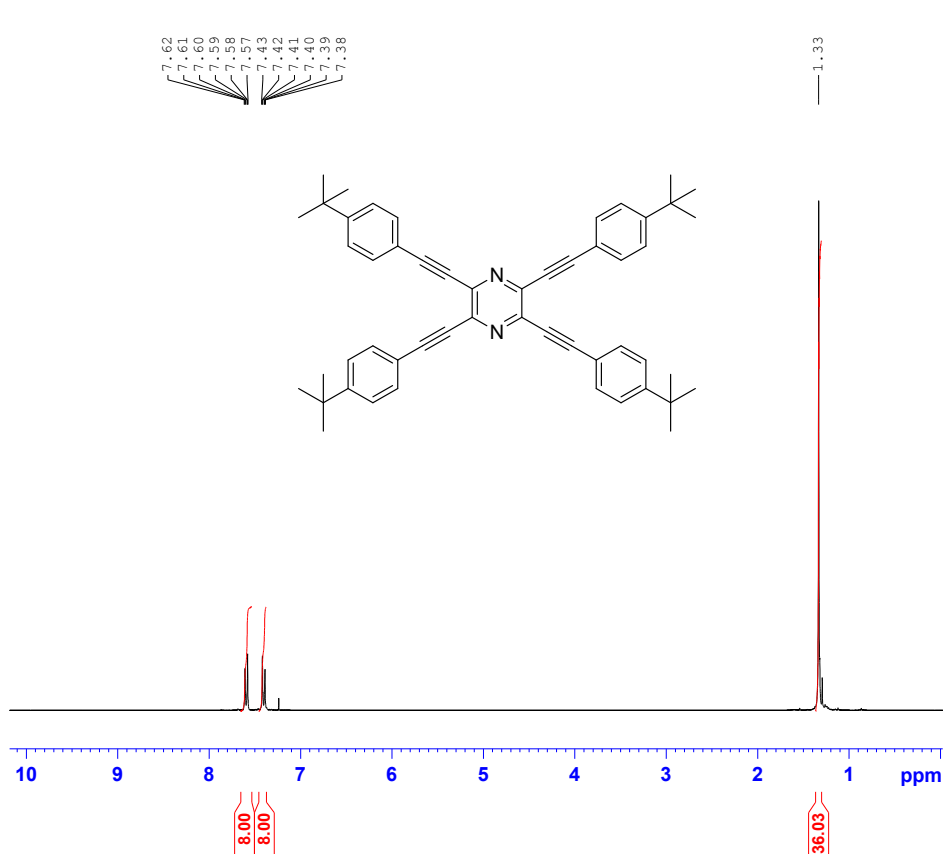

Current Data Parameters  
 NAME AP-176  
 EXPNO 10  
 PROCNO 1

F2 - Acquisition Parameters  
 Date\_ 20120826  
 Time\_ 8.23  
 INSTRUM AV300  
 PROBHD 5 mm PABBO BB-  
 PULPROG zg30  
 TD 32768  
 SOLVENT CDC13  
 NS 32  
 DS 4  
 SWH 6172.839 Hz  
 FIDRES 0.188380 Hz  
 AQ 2.6542079 sec  
 RG 101.6  
 DW 81.000 usec  
 DE 6.00 usec  
 TE 296.1 K  
 D1 1.00000000 sec  
 TD0 1

==== CHANNEL f1 =====  
 NUC1 1H  
 P1 11.00 usec  
 PL1 0 dB  
 SFO1 300.1318534 MHz

F2 - Processing parameters  
 SI 32768  
 SF 300.1300215 MHz  
 WDW EM  
 SSB 0  
 LB 0.10 Hz  
 GB 0  
 FC 1.00

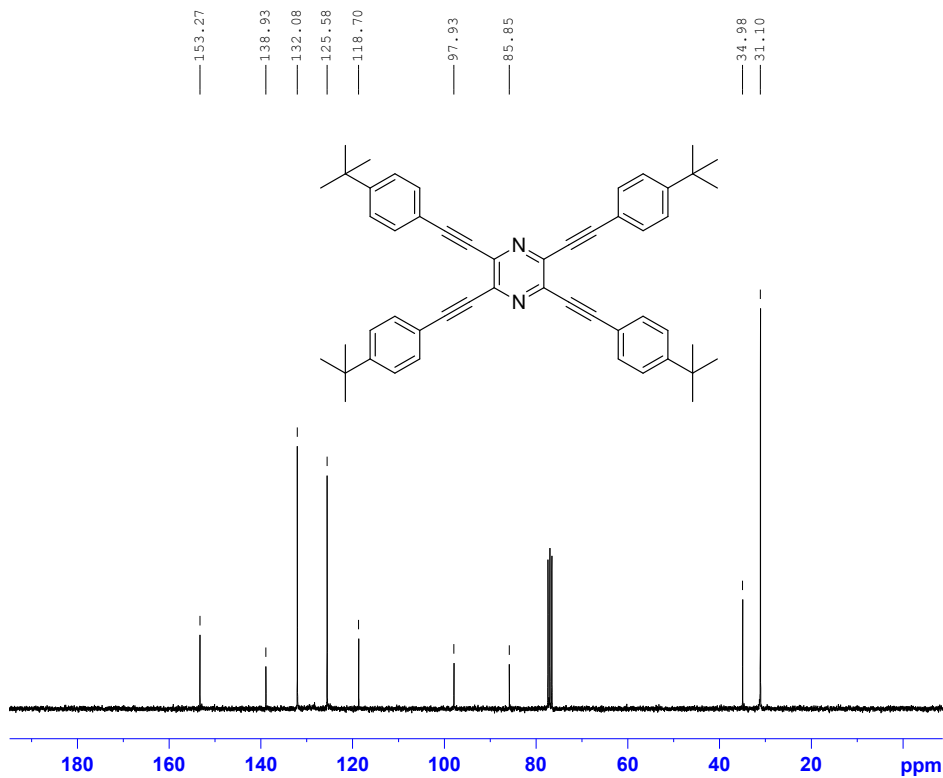

Current Data Parameters  
 NAME AP-176  
 EXPNO 11  
 PROCNO 1

F2 - Acquisition Parameters  
 Date\_ 20120826  
 Time\_ 8.38  
 INSTRUM AV300  
 PROBHD 5 mm PABBO BB-  
 PULPROG zgpg30  
 TD 32768  
 SOLVENT CDC13  
 NS 256  
 DS 4  
 SWH 21097.047 Hz  
 FIDRES 0.643831 Hz  
 AQ 0.7766016 sec  
 RG 32768  
 DW 23.700 usec  
 DE 6.00 usec  
 TE 296.6 K  
 D1 2.00000000 sec  
 d11 0.03000000 sec  
 DELTA 1.89999998 sec  
 TD0 1  
 SFO1 75.4771825 MHz  
 NUC1 13C  
 P1 9.60 usec  
 PLW1 -1.00000000 W  
 SFO2 300.1312005 MHz  
 NUC2 1H  
 CPDPRG2 waltz16  
 PCPD2 100.00 usec  
 PLW2 -1.00000000 W  
 PLW12 -1.00000000 W  
 PLW13 -1.00000000 W

F2 - Processing parameters  
 SI 32768  
 SF 75.4677554 MHz  
 WDW EM  
 SSB 0  
 LB 1.00 Hz  
 GB 0  
 FC 1.40

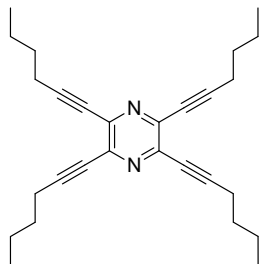

2.49  
2.46  
2.44  
1.64  
1.63  
1.62  
1.61  
1.60  
1.59  
1.58  
1.57  
1.56  
1.56  
1.54  
1.54  
1.53  
1.53  
1.52  
1.51  
1.51  
1.50  
1.49

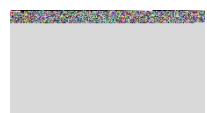

Current Data Parameters  
NAME AP-194  
EXPNO 10  
PROCNO 1

F2 - Acquisition Parameters  
Date\_ 20120914  
Time\_ 6.01  
INSTRUM AV300  
PROBHD 5 mm PABBO BB-  
PULPROG zg30  
TD 32768  
SOLVENT CDC13  
NS 32  
DS 4  
SWH 6172.839 Hz  
FIDRES 0.188380 Hz  
AQ 2.6542079 sec  
RG 101.6  
DW 81.000 usec  
DE 6.00 usec  
TE 295.4 K  
D1 1.00000000 sec  
TDO 1

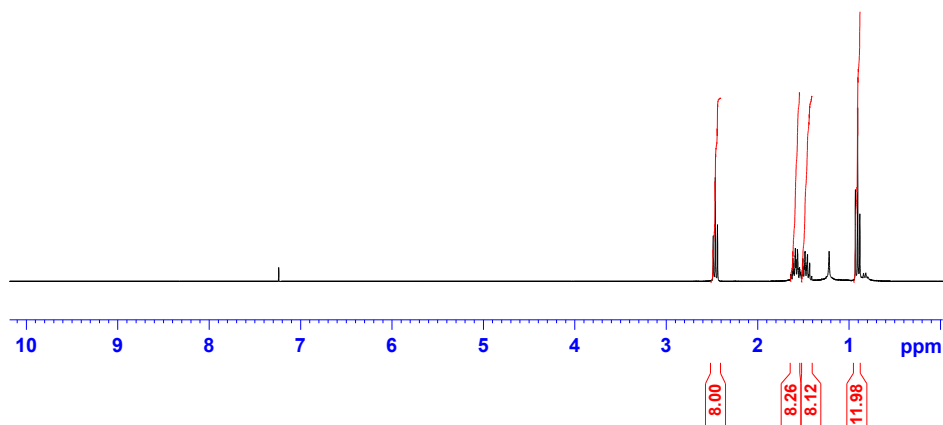

==== CHANNEL f1 =====  
NUC1 1H  
P1 11.00 usec  
PL1 0 dB  
SF01 300.1318534 MHz

F2 - Processing parameters  
SI 32768  
SF 300.1300215 MHz  
WDW EM  
SSB 0  
LB 0.10 Hz  
GB 0  
FC 1.00

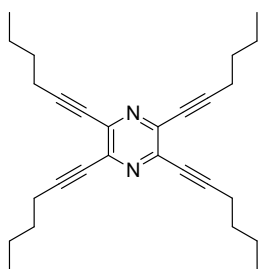

138.69  
98.86  
77.80  
30.16  
21.95  
19.39  
13.38

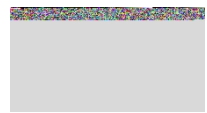

Current Data Parameters  
NAME AP-194  
EXPNO 11  
PROCNO 1

F2 - Acquisition Parameters  
Date\_ 20120914  
Time\_ 6.14  
INSTRUM AV300  
PROBHD 5 mm PABBO BB-  
PULPROG zgpg30  
TD 32768  
SOLVENT CDC13  
NS 256  
DS 4  
SWH 21097.047 Hz  
FIDRES 0.643831 Hz  
AQ 0.7766016 sec  
RG 32768  
DW 23.700 usec  
DE 6.00 usec  
TE 295.9 K  
D1 2.00000000 sec  
d11 0.03000000 sec  
DELTA 1.89999998 sec  
TDO 1  
SF01 75.4771825 MHz  
NUC1 13C  
P1 9.60 usec  
PLW1 -1.00000000 W  
SF02 300.1312005 MHz  
NUC2 1H  
CPDPRG[2] waltz16  
PCPD2 100.00 usec  
PLW2 -1.00000000 W  
PLW12 -1.00000000 W  
PLW13 -1.00000000 W

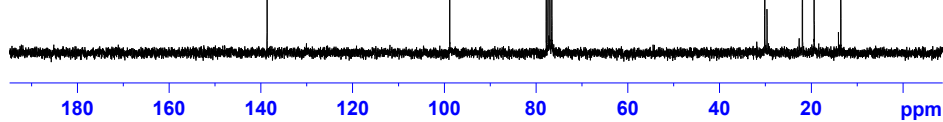

F2 - Processing parameters  
SI 32768  
SF 75.4677534 MHz  
WDW EM  
SSB 0  
LB 1.00 Hz  
GB 0  
PC 1.40



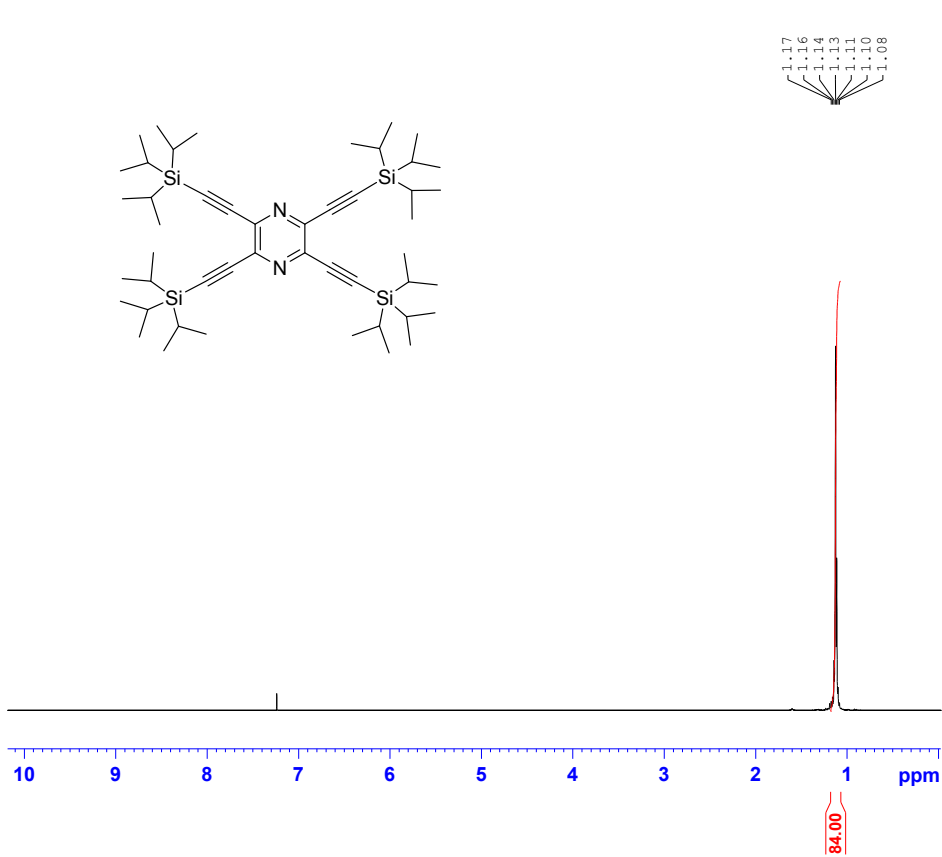

Current Data Parameters  
 NAME AP-203  
 EXPNO 10  
 PROCNO 1

F2 - Acquisition Parameters  
 Date\_ 20121001  
 Time\_ 10.42  
 INSTRUM AV300  
 PROBHD 5 mm PABBO BB-  
 PULPROG zg30  
 TD 32768  
 SOLVENT CDCl3  
 NS 32  
 DS 4  
 SWH 6172.839 Hz  
 FIDRES 0.188380 Hz  
 AQ 2.6542079 sec  
 RG 128  
 DW 81.000 usec  
 DE 6.00 usec  
 TE 294.5 K  
 D1 1.0000000 sec  
 TD0 1

==== CHANNEL f1 =====  
 NUC1 1H  
 P1 11.00 usec  
 PL1 0 dB  
 SF01 300.1318534 MHz

F2 - Processing parameters  
 SI 32768  
 SF 300.1300215 MHz  
 WDW EM  
 SSB 0  
 LB 0.10 Hz  
 GB 0  
 FC 1.00

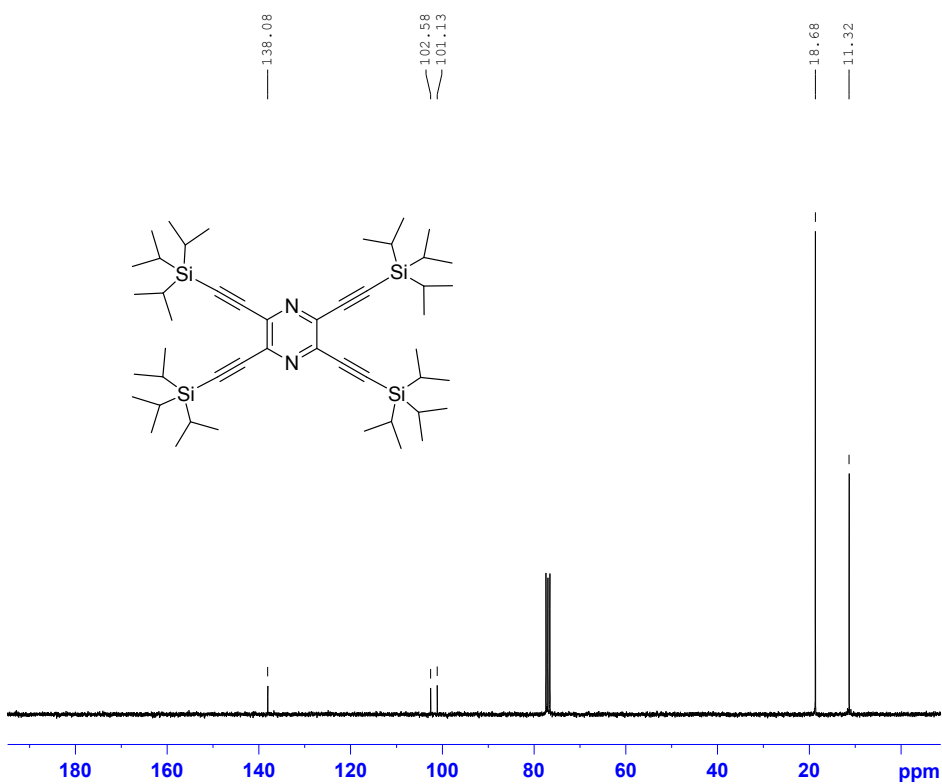

Current Data Parameters  
 NAME AP-203  
 EXPNO 11  
 PROCNO 1

F2 - Acquisition Parameters  
 Date\_ 20121001  
 Time\_ 10.55  
 INSTRUM AV300  
 PROBHD 5 mm PABBO BB-  
 FULPROG zgpg30  
 TD 32768  
 SOLVENT CDCl3  
 NS 256  
 DS 4  
 SWH 21097.047 Hz  
 FIDRES 0.643831 Hz  
 AQ 0.7766016 sec  
 RG 32768  
 DW 23.700 usec  
 DE 6.00 usec  
 TE 295.1 K  
 D1 2.0000000 sec  
 d11 0.0300000 sec  
 DELTA 1.8999999 sec  
 TD0 1  
 SF01 75.4771825 MHz  
 NUC1 13C  
 P1 9.60 usec  
 PLW1 -1.0000000 W  
 SF02 300.1312005 MHz  
 NUC2 1H  
 CPDPRG2 waltz16  
 FCPD2 100.00 usec  
 PLW2 -1.0000000 W  
 PLW12 -1.0000000 W  
 PLW13 -1.0000000 W

F2 - Processing parameters  
 SI 32768  
 SF 75.4677526 MHz  
 WDW EM  
 SSB 0  
 LB 1.00 Hz  
 GB 0  
 FC 1.40

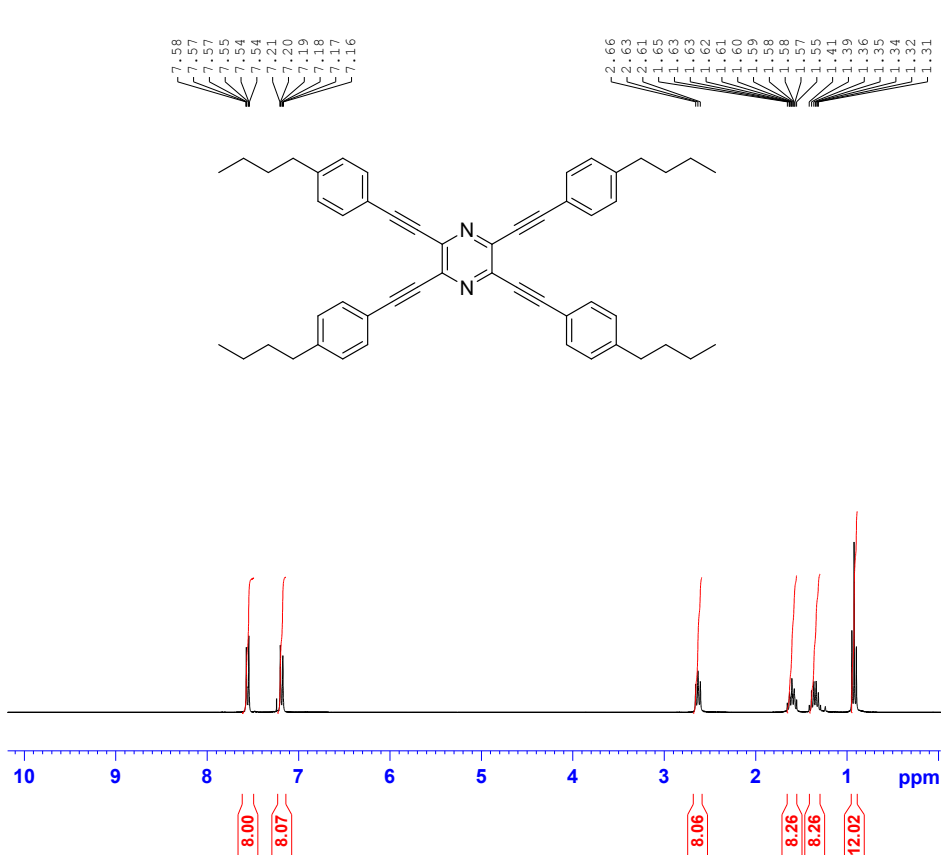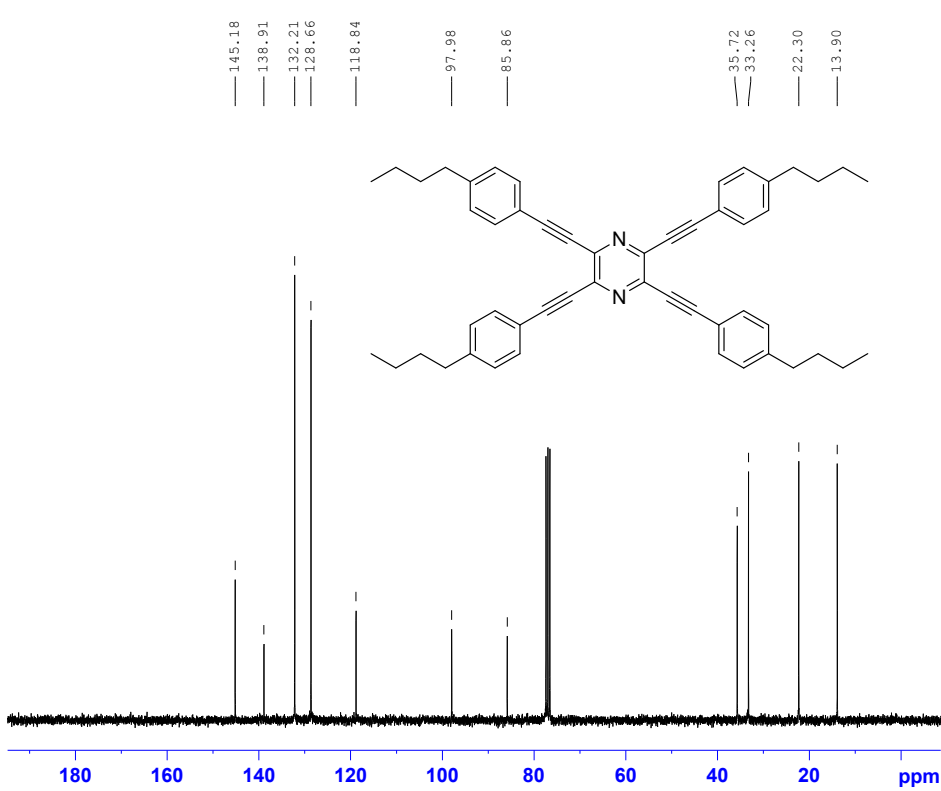

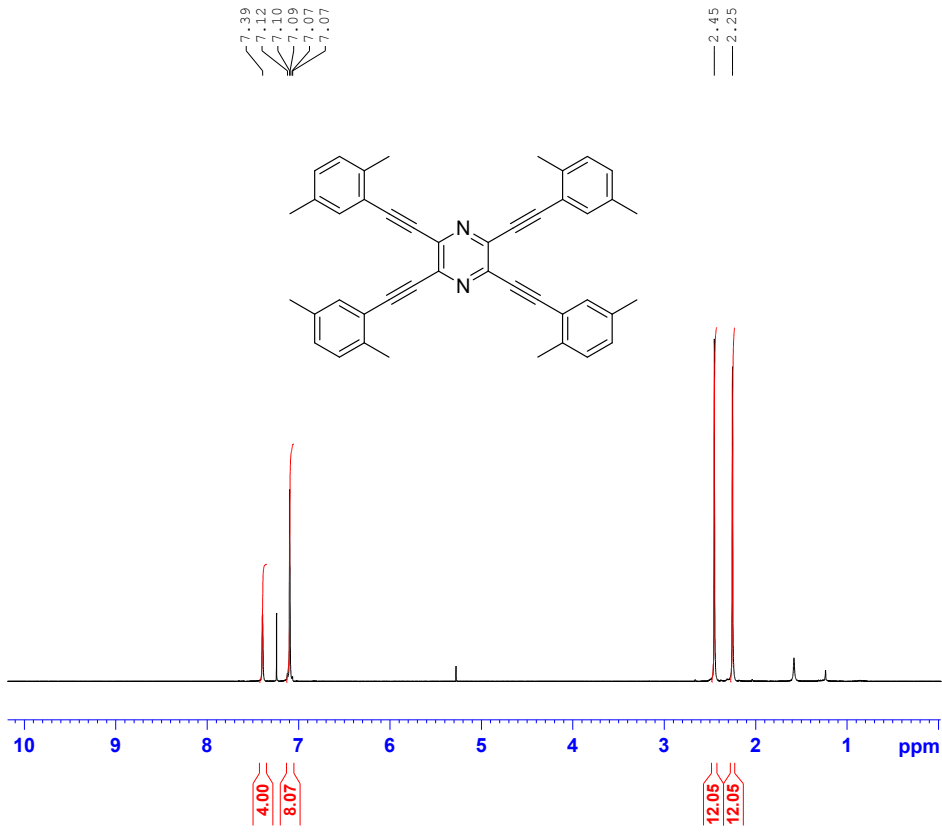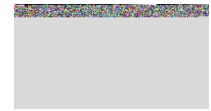

Current Data Parameters  
 NAME AP-405  
 EXPNO 10  
 PROCNO 1

F2 - Acquisition Parameters  
 Date\_ 20130622  
 Time\_ 7.53  
 INSTRUM AV300  
 PROBHD 5 mm PABBO BB-  
 PULPROG zg30  
 TD 32768  
 SOLVENT CDCl3  
 NS 32  
 DS 4  
 SWH 6172.839 Hz  
 FIDRES 0.188380 Hz  
 AQ 2.6542079 sec  
 RG 322.5  
 DW 81.000 usec  
 DE 6.00 usec  
 TE 295.7 K  
 D1 1.00000000 sec  
 TD0 1

===== CHANNEL f1 =====  
 NUC1 1H  
 P1 11.00 usec  
 PL1 0 dB  
 SFO1 300.1318534 MHz

F2 - Processing parameters  
 SI 32768  
 SF 300.1300214 MHz  
 WDW EM  
 SSB 0  
 LB 0.10 Hz  
 GB 0  
 FC 1.00

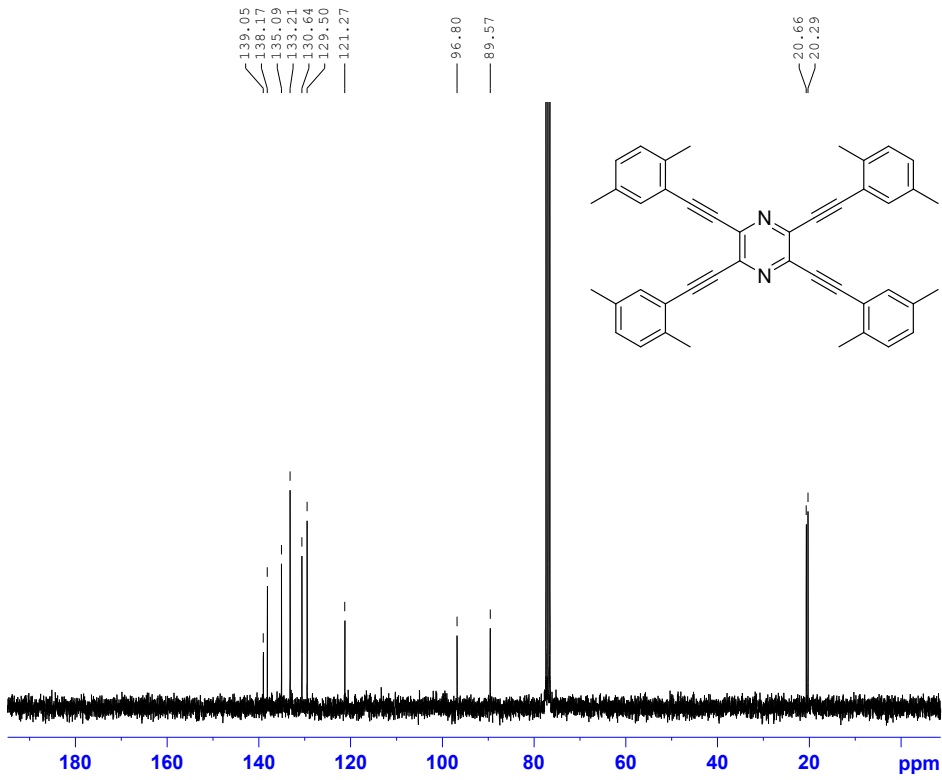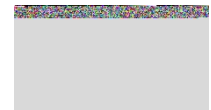

Current Data Parameters  
 NAME AP-405  
 EXPNO 11  
 PROCNO 1

F2 - Acquisition Parameters  
 Date\_ 20130622  
 Time\_ 8.05  
 INSTRUM AV300  
 PROBHD 5 mm PABBO BB-  
 PULPROG zgpg30  
 TD 32768  
 SOLVENT CDCl3  
 NS 256  
 DS 4  
 SWH 21097.047 Hz  
 FIDRES 0.643831 Hz  
 AQ 0.7766016 sec  
 RG 32768  
 DW 23.700 usec  
 DE 6.00 usec  
 TE 296.2 K  
 D1 2.00000000 sec  
 d11 0.03000000 sec  
 DELTA 1.89999998 sec  
 TD0 1  
 SFO1 75.4771825 MHz  
 NUC1 13C  
 P1 9.60 usec  
 PLM1 -1.00000000 W  
 SFO2 300.1312005 MHz  
 NUC2 1H  
 CPDPRG[2] waltz16  
 PCPD2 100.00 usec  
 PLW2 -1.00000000 W  
 PLW12 -1.00000000 W  
 PLW13 -1.00000000 W

F2 - Processing parameters  
 SI 32768  
 SF 75.4677534 MHz  
 WDW EM  
 SSB 0  
 LB 1.00 Hz  
 GB 0  
 FC 1.40

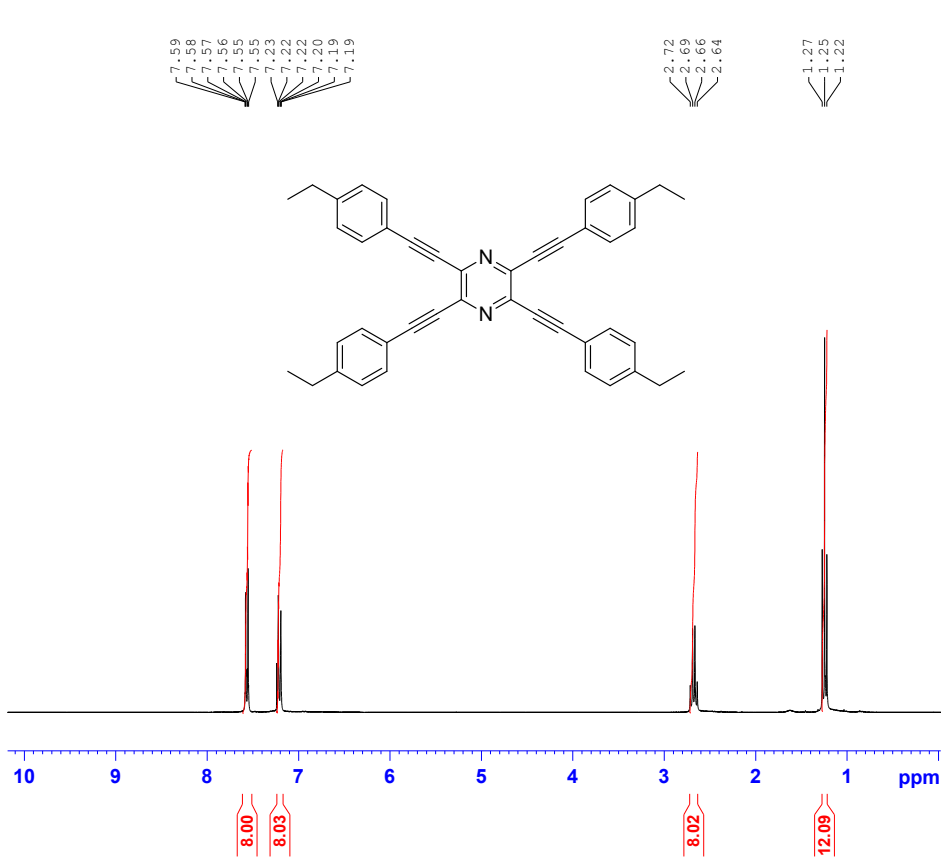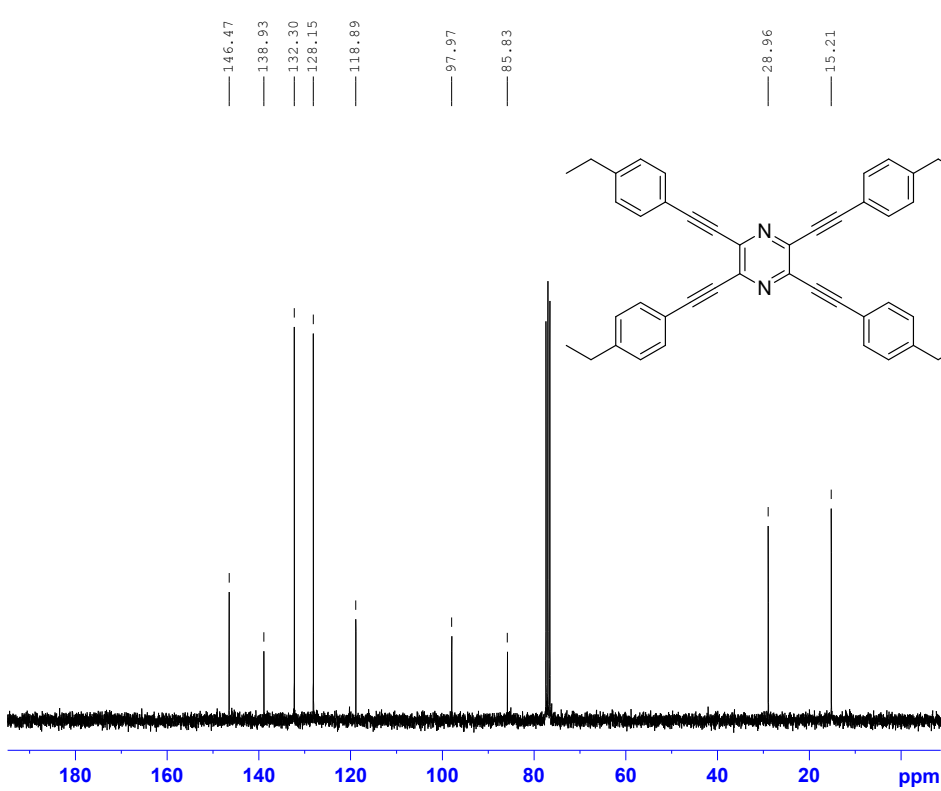

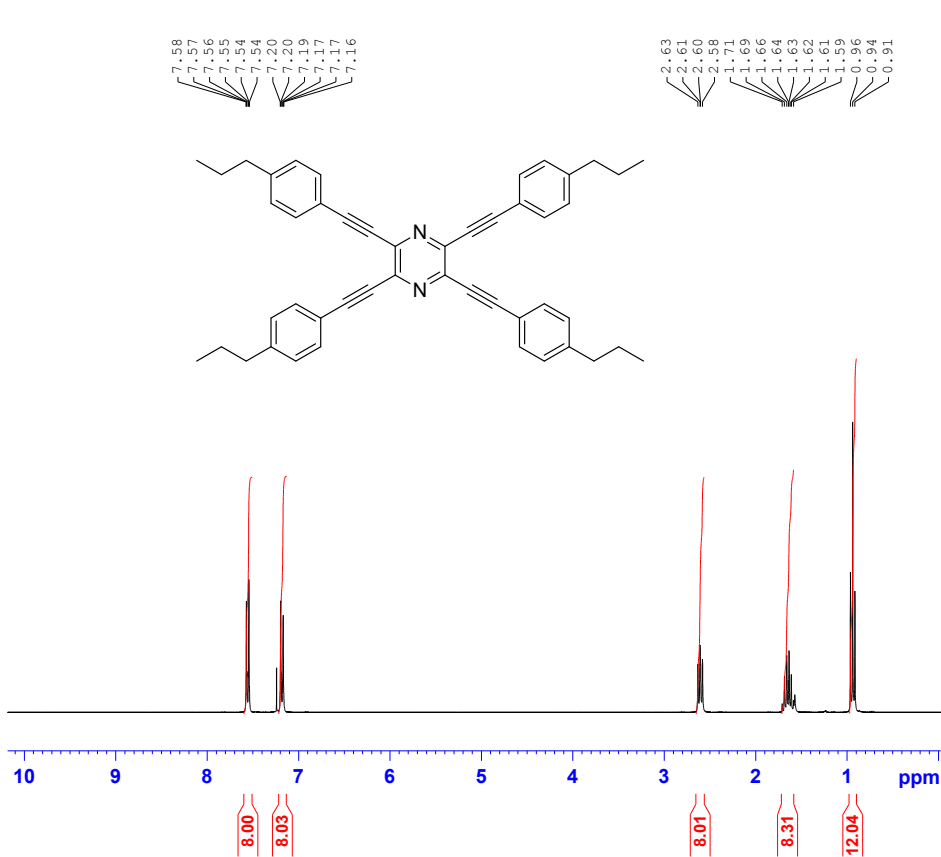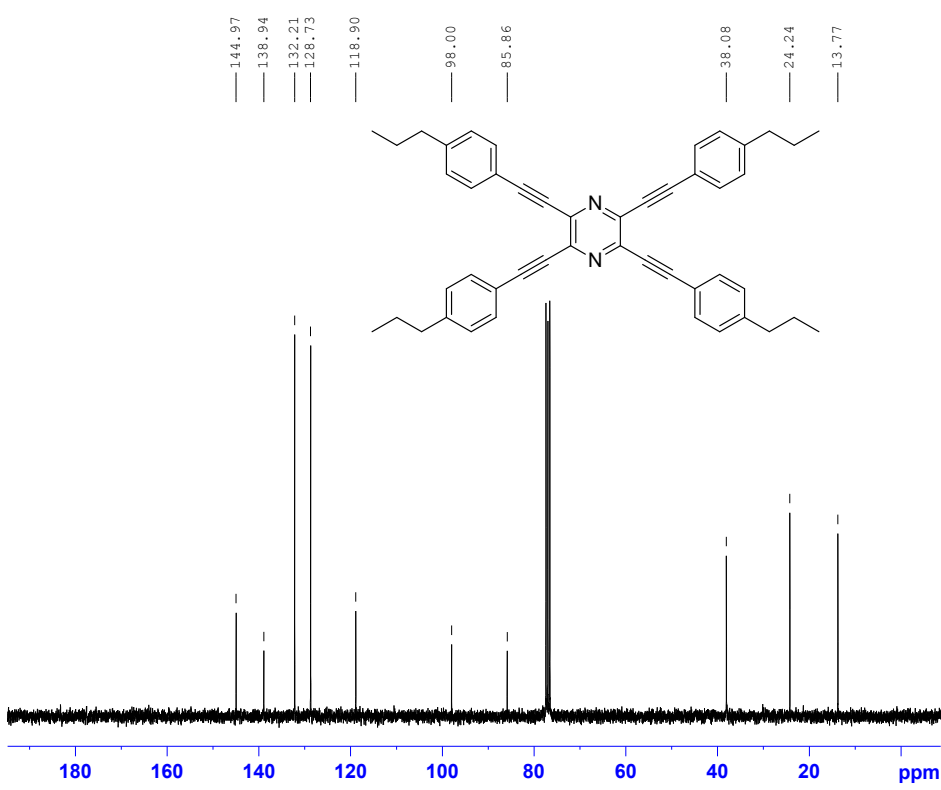

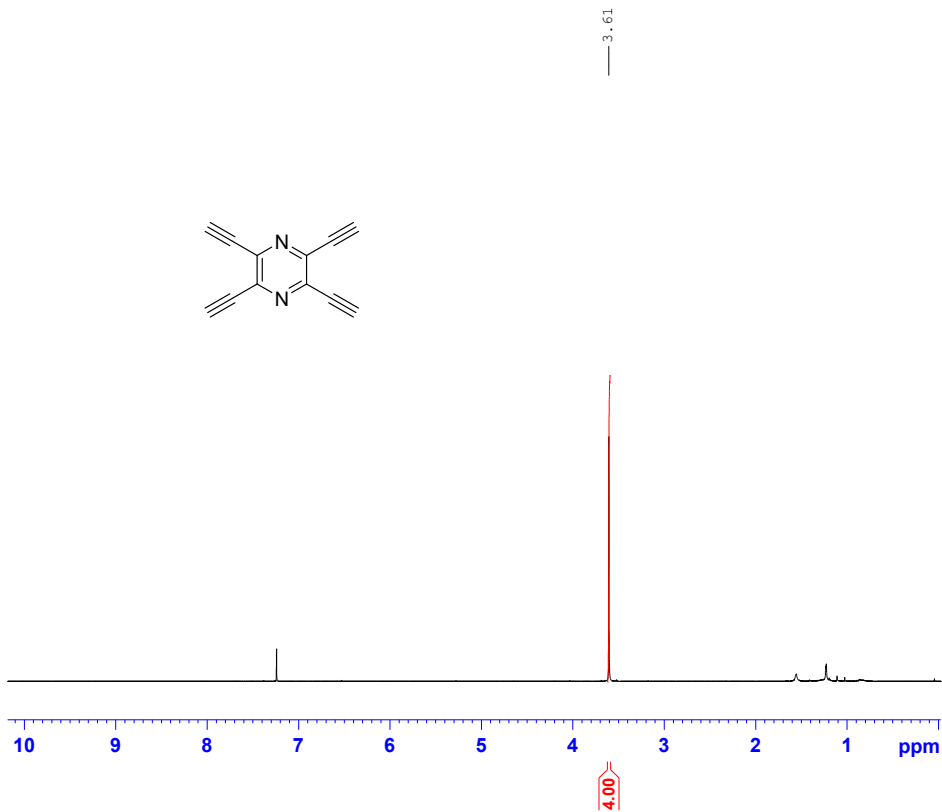

```

Current Data Parameters
NAME      AP-228
EXPNO    10
PROCNO   1

F2 - Acquisition Parameters
Date_    20121110
Time     2.04
INSTRUM  AV300
PROBHD   5 mm PABBO BB-
PULPROG  zg30
TD       32768
SOLVENT  CDC13
NS       32
DS       4
SWH      6172.839 Hz
FIDRES   0.188380 Hz
AQ       2.6542079 sec
RG       724.1
DW       81.000 usec
DE       6.00 usec
TE       294.1 K
D1       1.0000000 sec
TDO      1

===== CHANNEL f1 =====
NUC1     1H
P1       11.00 usec
PL1      0 dB
SFO1    300.1318534 MHz

F2 - Processing parameters
SI       32768
SF       300.1300214 MHz
WDW      EM
SSB      0
LB       0.10 Hz
GB       0
FC       1.00
  
```

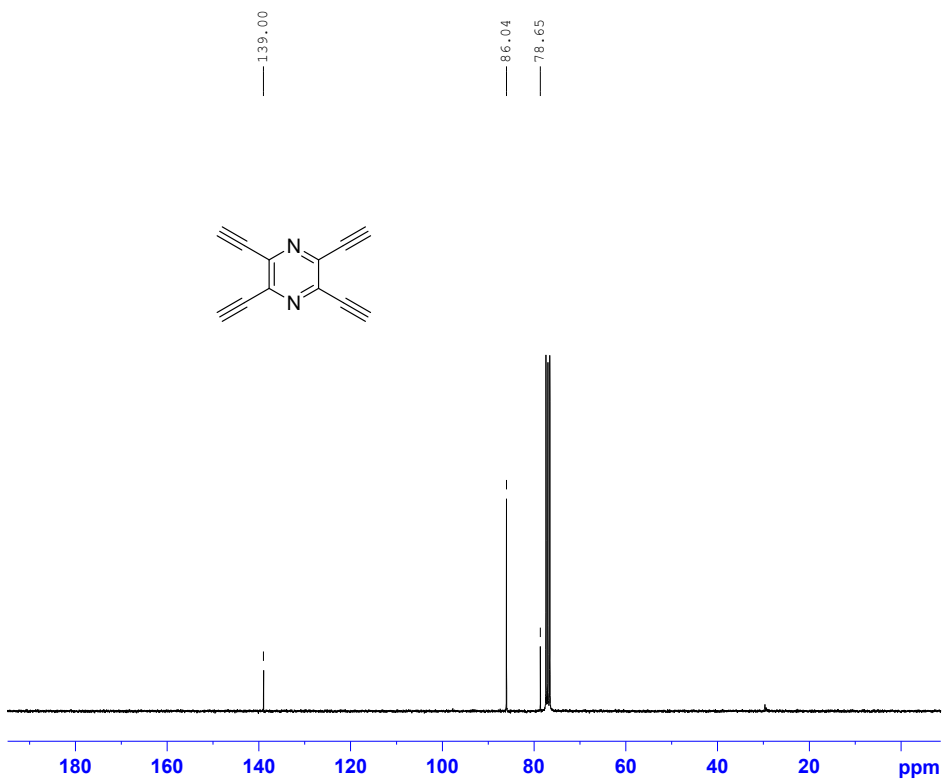

```

Current Data Parameters
NAME      AP-228
EXPNO    13
PROCNO   1

F2 - Acquisition Parameters
Date_    20121110
Time     7.05
INSTRUM  AV300
PROBHD   5 mm PABBO BB-
PULPROG  zgpg30
TD       32768
SOLVENT  CDC13
NS       6000
DS       4
SWH      21097.047 Hz
FIDRES   0.643831 Hz
AQ       0.7766016 sec
RG       32768
DW       23.700 usec
DE       6.00 usec
TE       294.7 K
D1       2.0000000 sec
d11      0.0300000 sec
DELTA    1.8999999 sec
TDO      1
SFO1    75.4771825 MHz
NUC1     13C
P1       9.60 usec
PLW1    -1.0000000 W
SFO2    300.1312005 MHz
NUC2     1H
CPDPRG2  waltz16
PCPD2    100.00 usec
PLW2    -1.0000000 W
PLW12   -1.0000000 W
PLW13   -1.0000000 W

F2 - Processing parameters
SI       32768
SF       75.4677528 MHz
WDW      EM
SSB      0
LB       1.00 Hz
GB       0
FC       1.40
  
```
